# Supplementary material for: Chronic Ethanol Exposure Produces Time- and Brain Region-Dependent Changes in Gene Coexpression Networks
Source: PubMed Central journal article supplement (PMC4372440; doi:10.1371/journal.pone.0121522), 2015-03-24
Supplement: pone.0121522.s001.pdf [file pone.0121522.s001.pdf]

Micropunch Coordinates: PFC

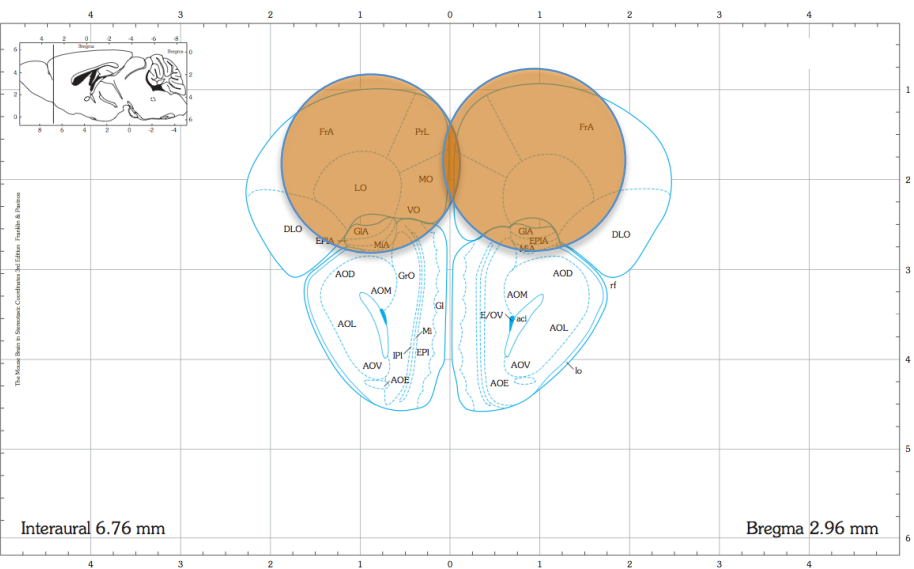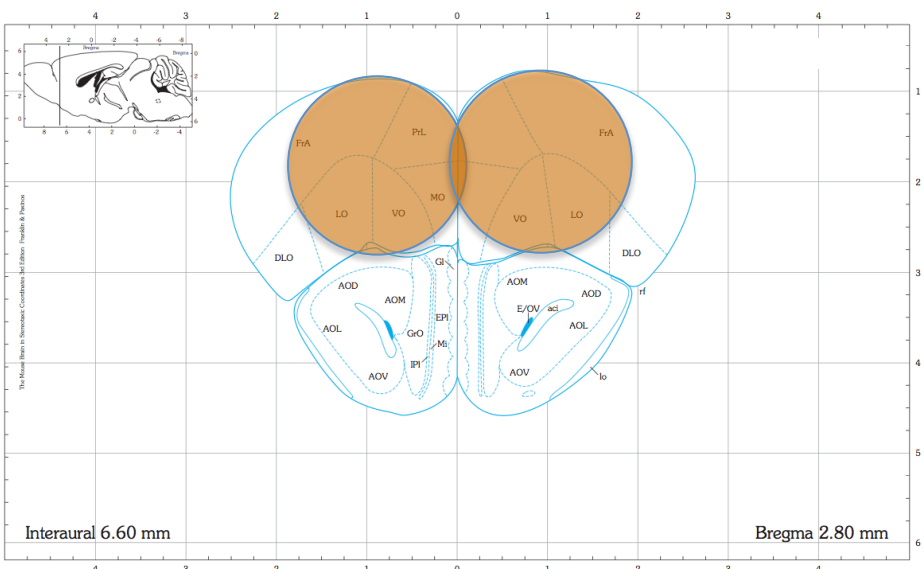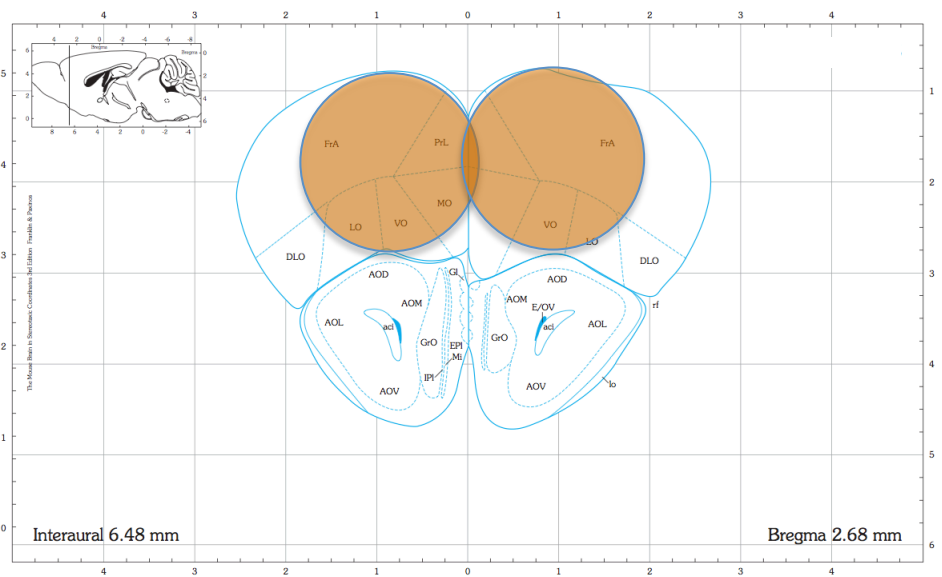

Bregma (+3.00)..(+2.70)

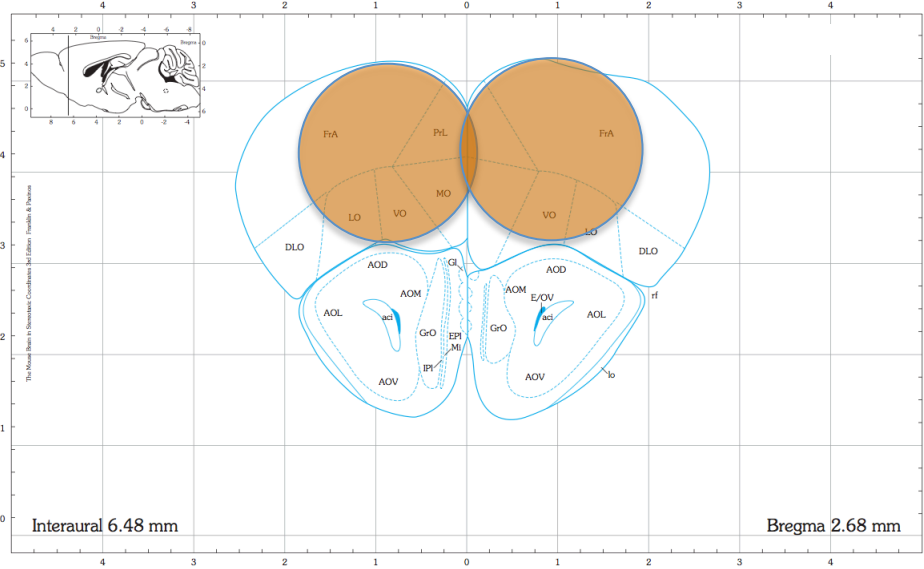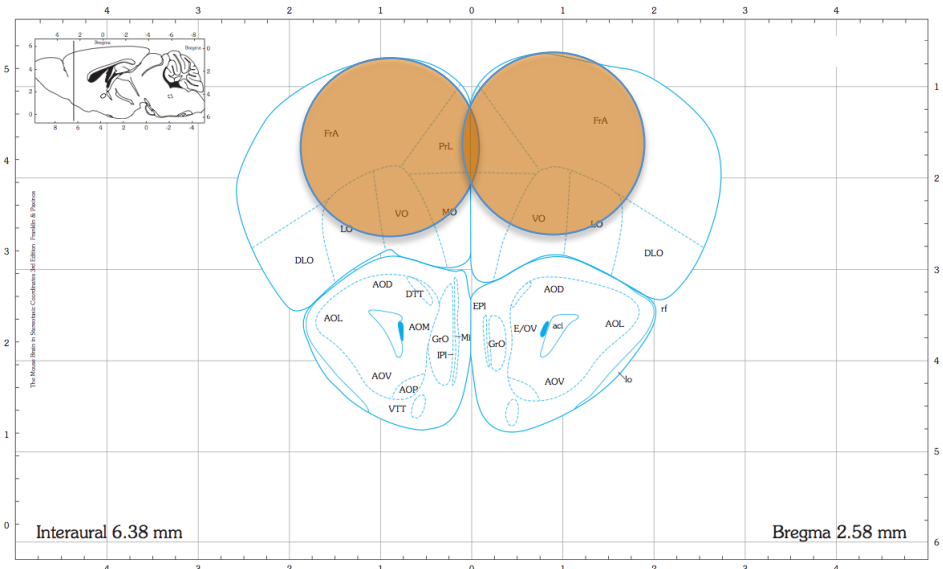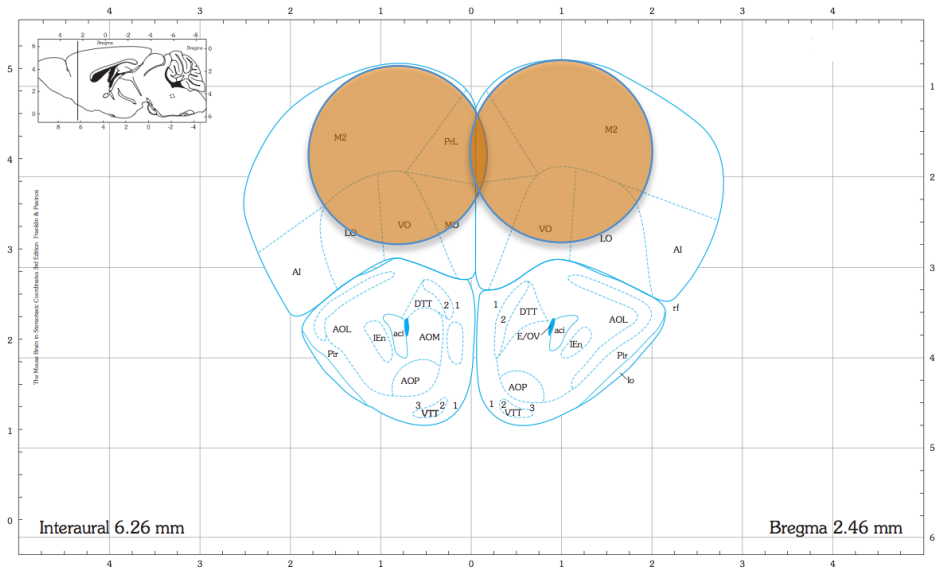

Bregma (+2.70)..(+2.40)

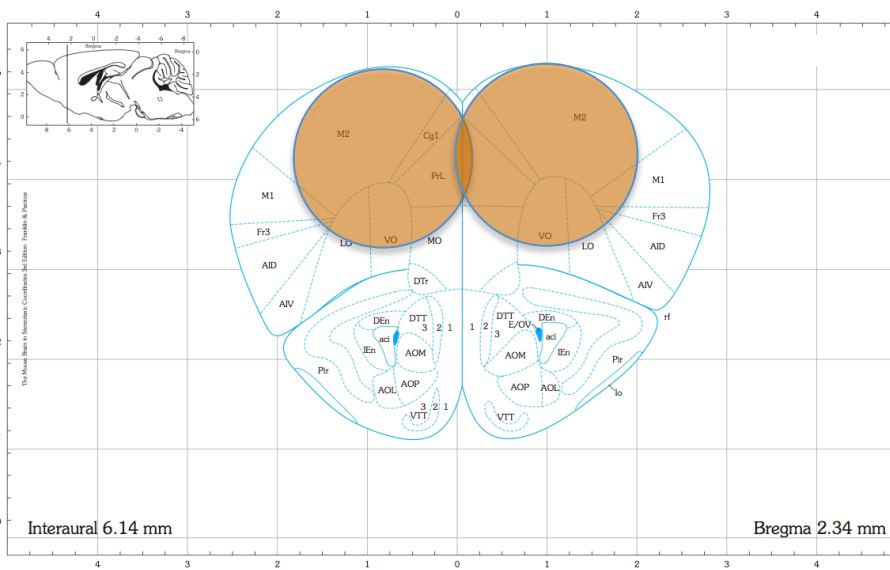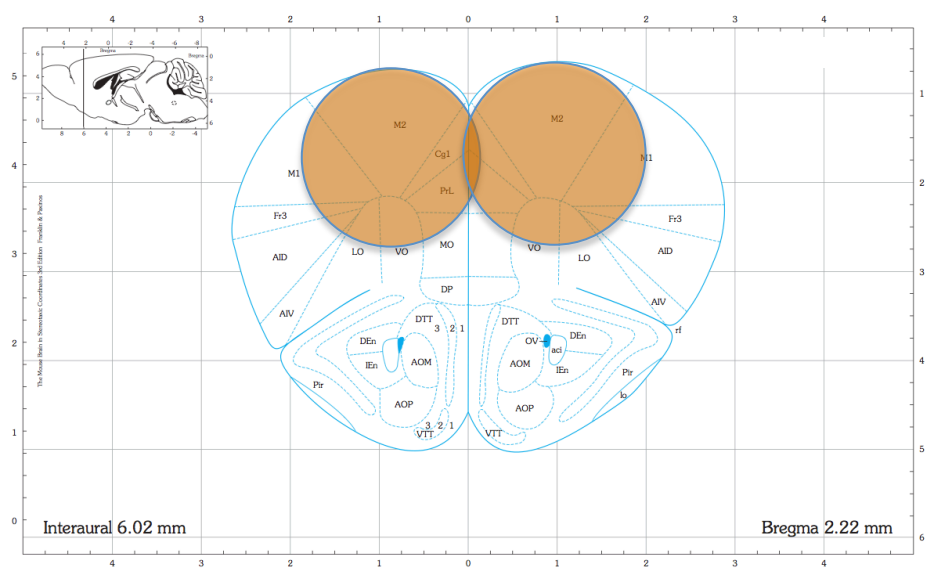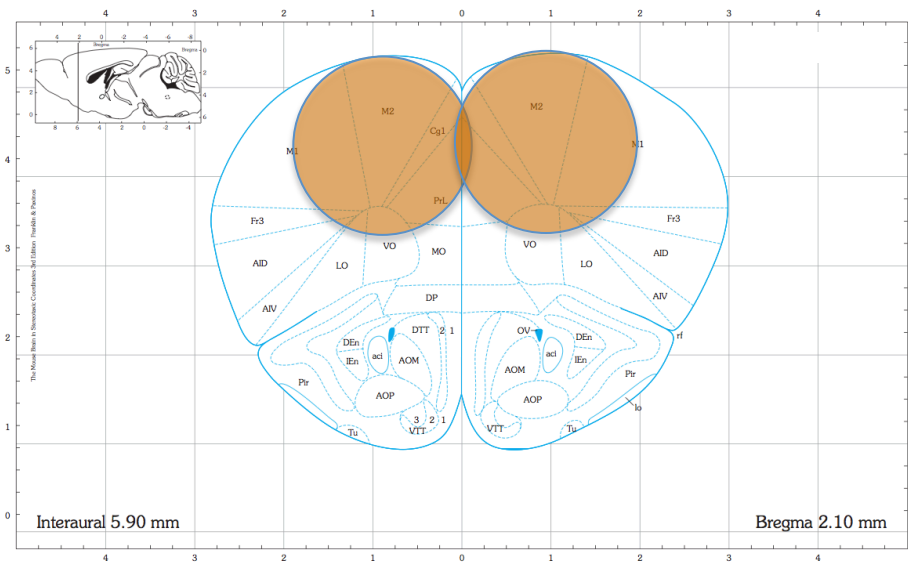

Bregma (+2.40)..(+2.10)

Micropunch Coordinates: NAC

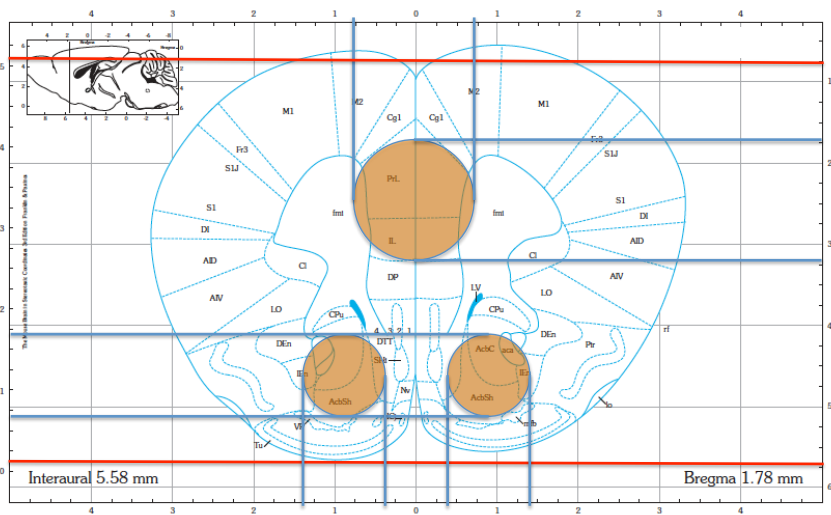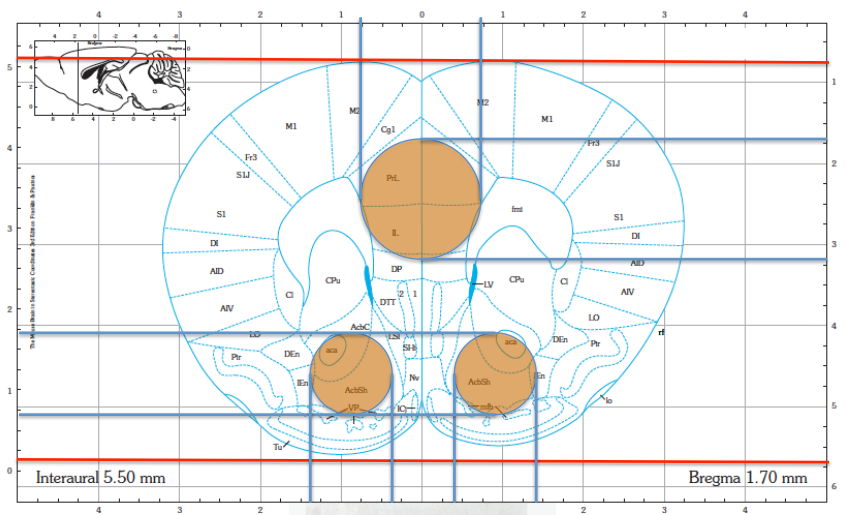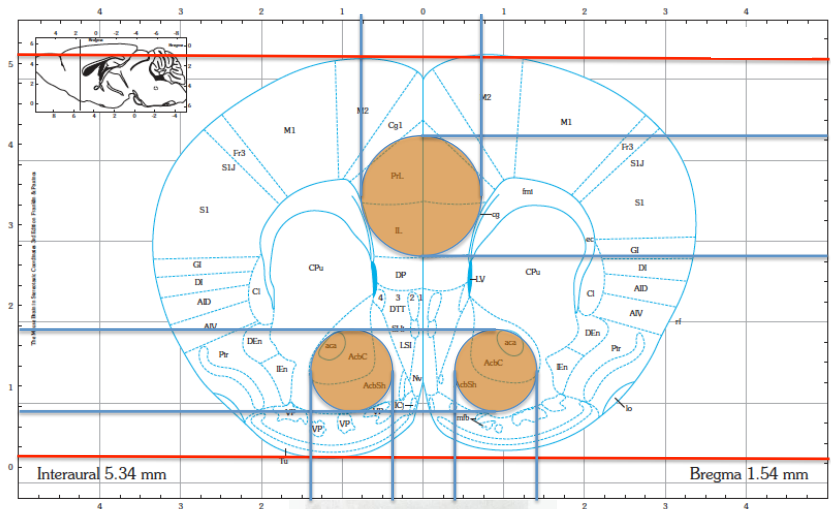

Bregma (+1.80)..(+1.20)

Micropunch Coordinates: AMY

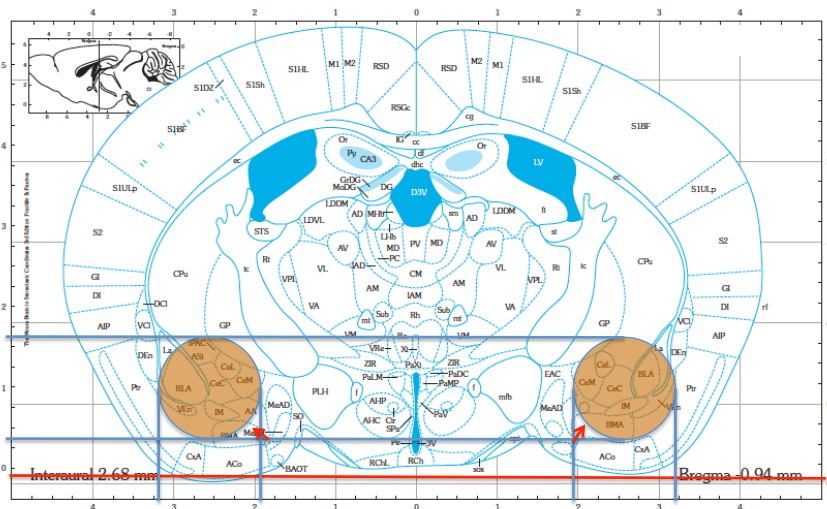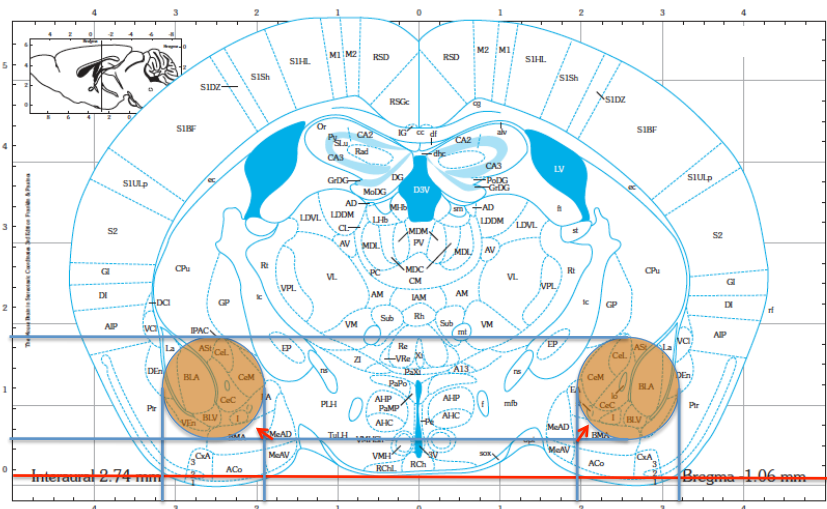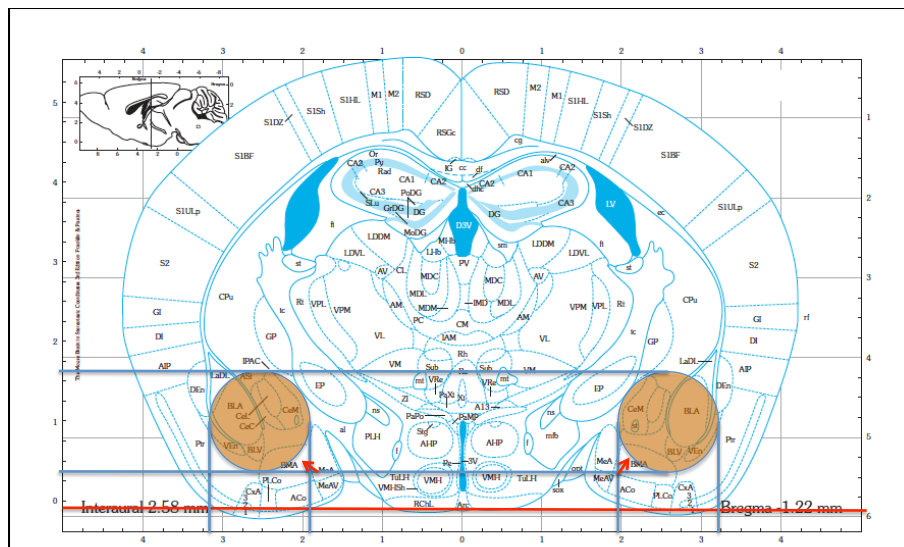

Bregma (-1.60)..(-0.90)
