# Supplementary material for: Chronic Ethanol Exposure Produces Time- and Brain Region-Dependent Changes in Gene Coexpression Networks
Source: PubMed Central journal article supplement (PMC4372440; doi:10.1371/journal.pone.0121522), 2015-03-24
Supplement: pone.0121522.s002.pdf [file pone.0121522.s002.pdf]

### Cluster 1

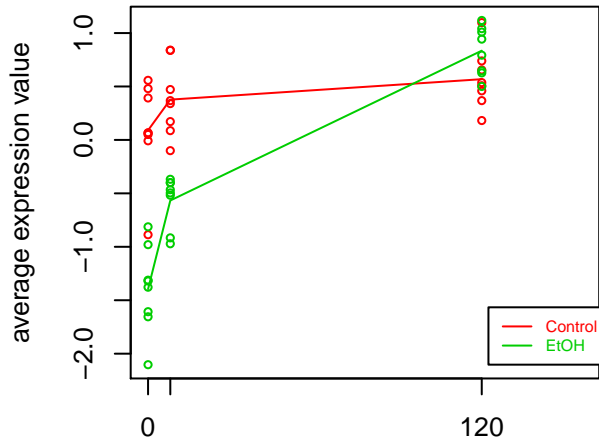

time  
Median profile of 13 genes

### Cluster 2

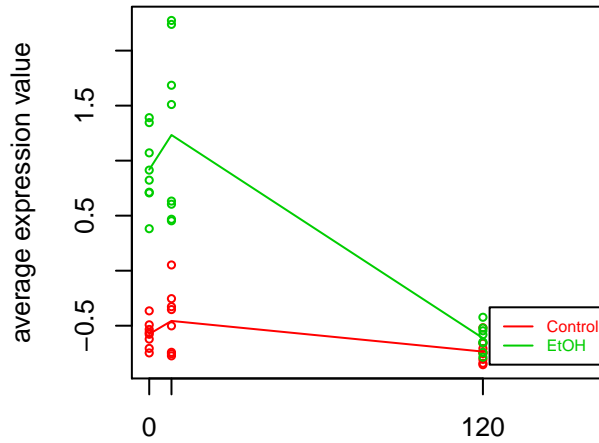

time  
Median profile of 15 genes

### Cluster 3

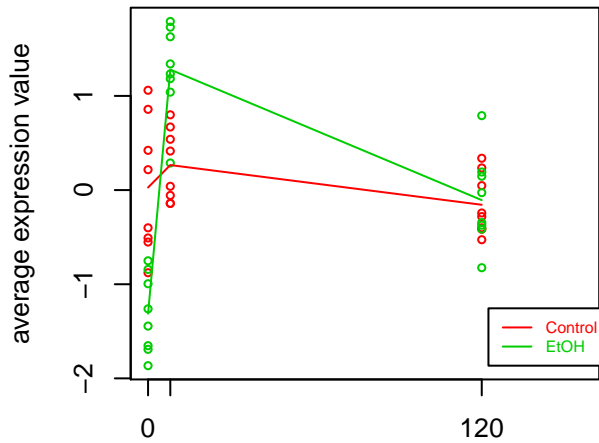

time  
Median profile of 2 genes

### Cluster 4

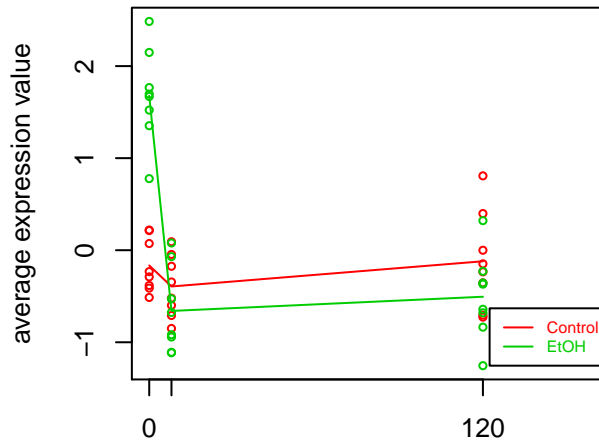

time  
Median profile of 4 genes
