# Supplementary material for: Chronic Ethanol Exposure Produces Time- and Brain Region-Dependent Changes in Gene Coexpression Networks
Source: PubMed Central journal article supplement (PMC4372440; doi:10.1371/journal.pone.0121522), 2015-03-24

**Cluster 1**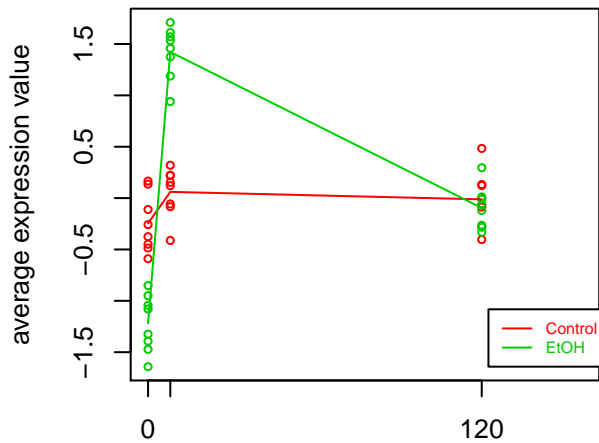**Cluster 2**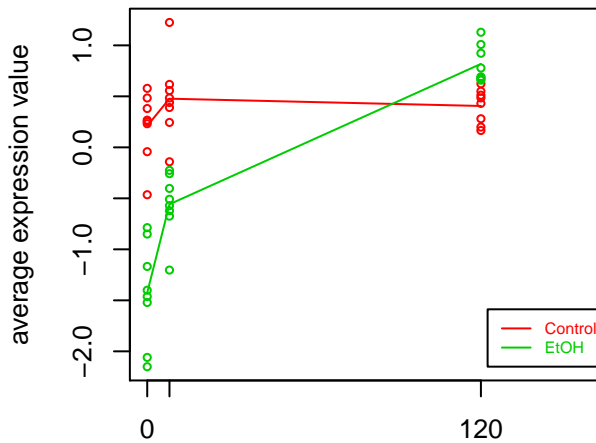**Cluster 3**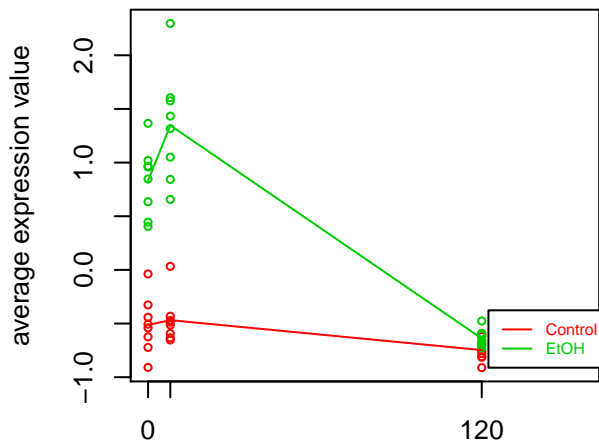**Cluster 4**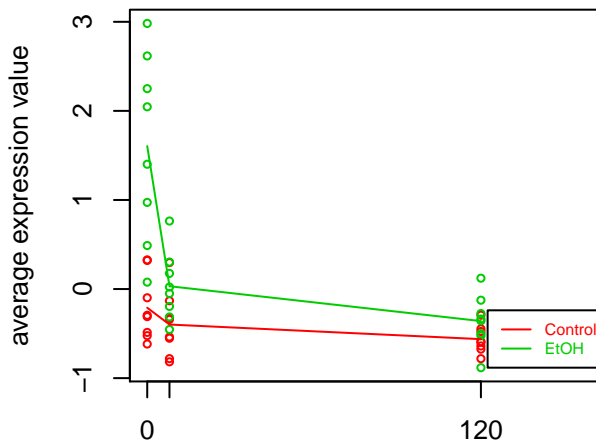

Supplement: pone.0121522.s003.pdf [file pone.0121522.s003.pdf]
