# Supplementary material for: Chronic Ethanol Exposure Produces Time- and Brain Region-Dependent Changes in Gene Coexpression Networks
Source: PubMed Central journal article supplement (PMC4372440; doi:10.1371/journal.pone.0121522), 2015-03-24

### Cluster 1

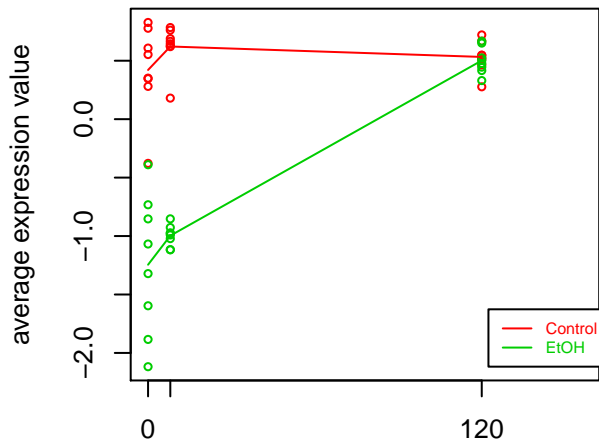

### Cluster 2

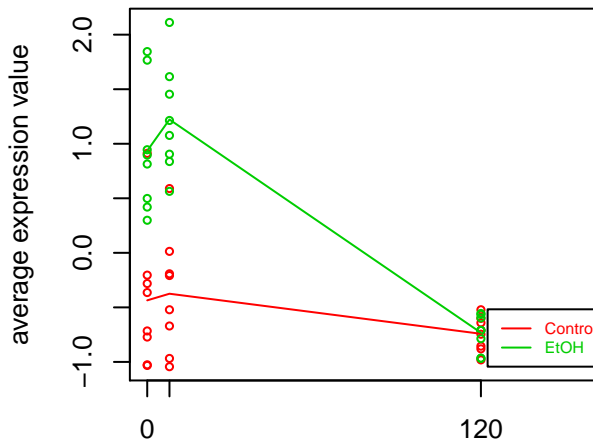

### Cluster 3

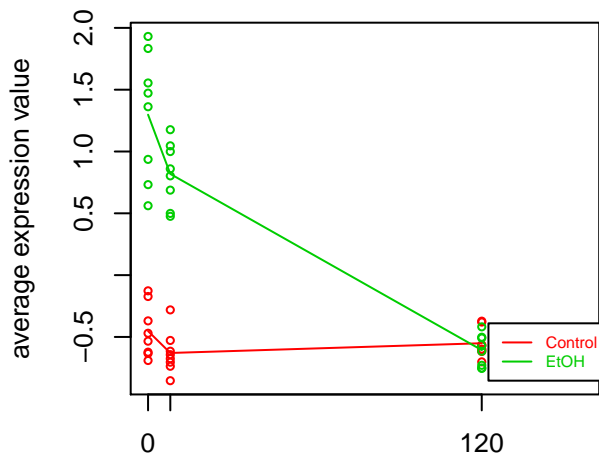

### Cluster 4

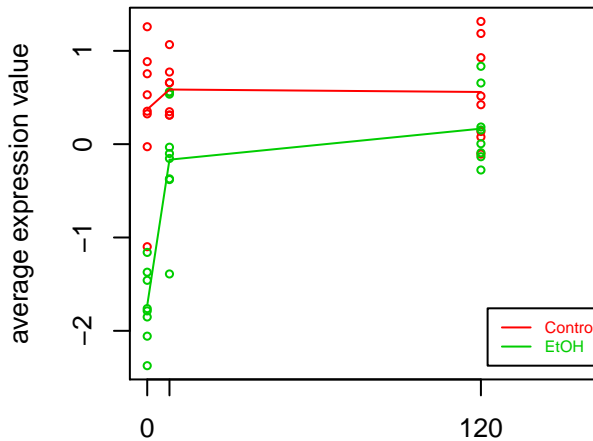

Supplement: pone.0121522.s005.pdf [file pone.0121522.s005.pdf]
